# Supplementary material for: Dispersion of U-series natural radionuclides in stream sediments from Edale, UK
Source: Royal Society of Chemistry journal article supplement (doi:10.1039/c3em00609c), 2014-01-01
Supplement: c3em00609c1.pdf [file c3em00609c1.pdf]

### Supporting information

**Table S1** Average activity concentrations (Bq.kg<sup>-1</sup> dry weight) of Edale sediments (total dissolution) and loss on ignition (wt.%) of the hierarchical cluster analysis (S.D. = standard deviation).

#### Group T1

|             | <sup>238</sup> U | <sup>234</sup> U | <sup>230</sup> Th | <sup>226</sup> Ra | L.O.I |
|-------------|------------------|------------------|-------------------|-------------------|-------|
| <b>E3</b>   | 24               | 24               | 20                | 45                | 5     |
| <b>E6</b>   | 24               | 27               | 19                | 29                | 6     |
| <b>E9</b>   | 22               | 24               | 45                | 36                | 5     |
| <b>E10</b>  | 36               | 41               | 20                | 39                | 6     |
| <b>E13</b>  | 19               | 21               | 21                | 15                | 3     |
| <b>E14</b>  | 18               | 18               | 13                | 29                | 2     |
| <b>E15</b>  | 9                | 12               | 9                 | 18                | 4     |
| <b>E20</b>  | 14               | 15               | 19                | 36                | 2     |
| <b>E21</b>  | 20               | 24               | 20                | 33                | 4     |
| <b>Mean</b> | 21               | 23               | 21                | 31                | 4     |
| <b>S.D.</b> | 8                | 8                | 10                | 10                | 2     |

#### Group T2

|             | <sup>238</sup> U | <sup>234</sup> U | <sup>230</sup> Th | <sup>226</sup> Ra | L.O.I |
|-------------|------------------|------------------|-------------------|-------------------|-------|
| <b>E2</b>   | 43               | 49               | 46                | 53                | 7     |
| <b>E5</b>   | 34               | 38               | 34                | 66                | 6     |
| <b>E11</b>  | 46               | 45               | 37                | 70                | 5     |
| <b>E12</b>  | 35               | 38               | 33                | 61                | 3     |
| <b>Mean</b> | 40               | 42               | 38                | 63                | 5     |
| <b>S.D.</b> | 6                | 5                | 6                 | 7                 | 2     |

### Group T3

|             | <sup>238</sup> U | <sup>234</sup> U | <sup>230</sup> Th | <sup>226</sup> Ra | L.O.I |
|-------------|------------------|------------------|-------------------|-------------------|-------|
| <b>E1</b>   | 72               | 75               | 30                | 70                | 6     |
| <b>E4</b>   | 30               | 32               | 31                | 131               | 5     |
| <b>E22</b>  | 86               | 84               | 64                | 119               | 6     |
| <b>Mean</b> | 63               | 64               | 42                | 106               | 6     |
| <b>S.D.</b> | 29               | 28               | 19                | 32                | 0.6   |

### Group T4

|             | <sup>238</sup> U | <sup>234</sup> U | <sup>230</sup> Th | <sup>226</sup> Ra | L.O.I |
|-------------|------------------|------------------|-------------------|-------------------|-------|
| <b>E19</b>  | 64               | 59               | 33                | 107               | 19    |
| <b>E24</b>  | 48               | 65               | 56                | 104               | 15    |
| <b>E25</b>  | 51               | 63               | 38                | 89                | 15    |
| <b>Mean</b> | 54               | 62               | 42                | 100               | 16    |
| <b>S.D.</b> | 9                | 3                | 12                | 10                | 2     |

### Group T5

|             | <sup>238</sup> U | <sup>234</sup> U | <sup>230</sup> Th | <sup>226</sup> Ra | L.O.I |
|-------------|------------------|------------------|-------------------|-------------------|-------|
| <b>E7</b>   | 25               | 29               | 19                | 57                | 13    |
| <b>E16</b>  | 24               | 23               | 25                | 40                | 18    |
| <b>E17</b>  | 41               | 53               | 38                | 44                | 18    |
| <b>E18</b>  | 33               | 47               | 27                | 48                | 11    |
| <b>Mean</b> | 31               | 38               | 27                | 47                | 15    |
| <b>S.D.</b> | 8                | 14               | 8                 | 7                 | 4     |

**Table S2** Average activity concentrations (Bq.kg<sup>-1</sup> dry weight) of Edale sediments (leached) and loss on ignition (wt.%) of the hierarchical cluster analysis (S.D. = standard deviation).

**Group L1**

|             | <sup>238</sup> U | <sup>234</sup> U | <sup>230</sup> Th | <sup>226</sup> Ra | L.O.I |
|-------------|------------------|------------------|-------------------|-------------------|-------|
| <b>E3</b>   | 7                | 9                | 6                 | 17                | 5     |
| <b>E5</b>   | 14               | 18               | 19                | 21                | 6     |
| <b>E6</b>   | 7                | 8                | 7                 | 13                | 6     |
| <b>E9</b>   | 10               | 13               | 13                | 14                | 5     |
| <b>E10</b>  | 17               | 20               | 20                | 19                | 6     |
| <b>E11</b>  | 9                | 10               | 19                | 24                | 5     |
| <b>E13</b>  | 18               | 22               | 6                 | 9                 | 3     |
| <b>E14</b>  | 5                | 6                | 5                 | 10                | 2     |
| <b>E15</b>  | 5                | 5                | 3                 | 8                 | 4     |
| <b>E20</b>  | 8                | 10               | 14                | 11                | 2     |
| <b>E21</b>  | 11               | 15               | 14                | 35                | 4     |
| <b>Mean</b> | 10               | 12               | 12                | 16                | 4     |
| <b>S.D.</b> | 5                | 6                | 6                 | 8                 | 2     |

**Group L2**

|             | <sup>238</sup> U | <sup>234</sup> U | <sup>230</sup> Th | <sup>226</sup> Ra | L.O.I |
|-------------|------------------|------------------|-------------------|-------------------|-------|
| <b>E1</b>   | 25               | 31               | 18                | 56                | 6     |
| <b>E2</b>   | 19               | 25               | 28                | 53                | 7     |
| <b>E12</b>  | 25               | 27               | 40                | 20                | 3     |
| <b>E18</b>  | 17               | 20               | 15                | 39                | 11    |
| <b>Mean</b> | 21               | 26               | 25                | 42                | 7     |
| <b>S.D.</b> | 4                | 4                | 12                | 16                | 3     |

### Group L3

|             | <sup>238</sup> U | <sup>234</sup> U | <sup>230</sup> Th | <sup>226</sup> Ra | L.O.I |
|-------------|------------------|------------------|-------------------|-------------------|-------|
| <b>E7</b>   | 7                | 8                | 6                 | 14                | 13    |
| <b>E16</b>  | 7                | 9                | 6                 | 9                 | 18    |
| <b>E17</b>  | 13               | 15               | 9                 | 41                | 18    |
| <b>Mean</b> | 9                | 11               | 7                 | 22                | 17    |
| <b>S.D.</b> | 4                | 4                | 2                 | 17                | 3     |

### Group L4

|             | <sup>238</sup> U | <sup>234</sup> U | <sup>230</sup> Th | <sup>226</sup> Ra | L.O.I |
|-------------|------------------|------------------|-------------------|-------------------|-------|
| <b>E19</b>  | 32               | 33               | 30                | 86                | 19    |
| <b>E22</b>  | 40               | 47               | 42                | 84                | 6     |
| <b>E24</b>  | 29               | 39               | 22                | 115               | 15    |
| <b>E25</b>  | 34               | 47               | 24                | 92                | 15    |
| <b>Mean</b> | 34               | 41               | 30                | 94                | 14    |
| <b>S.D.</b> | 5                | 7                | 9                 | 15                | 5     |

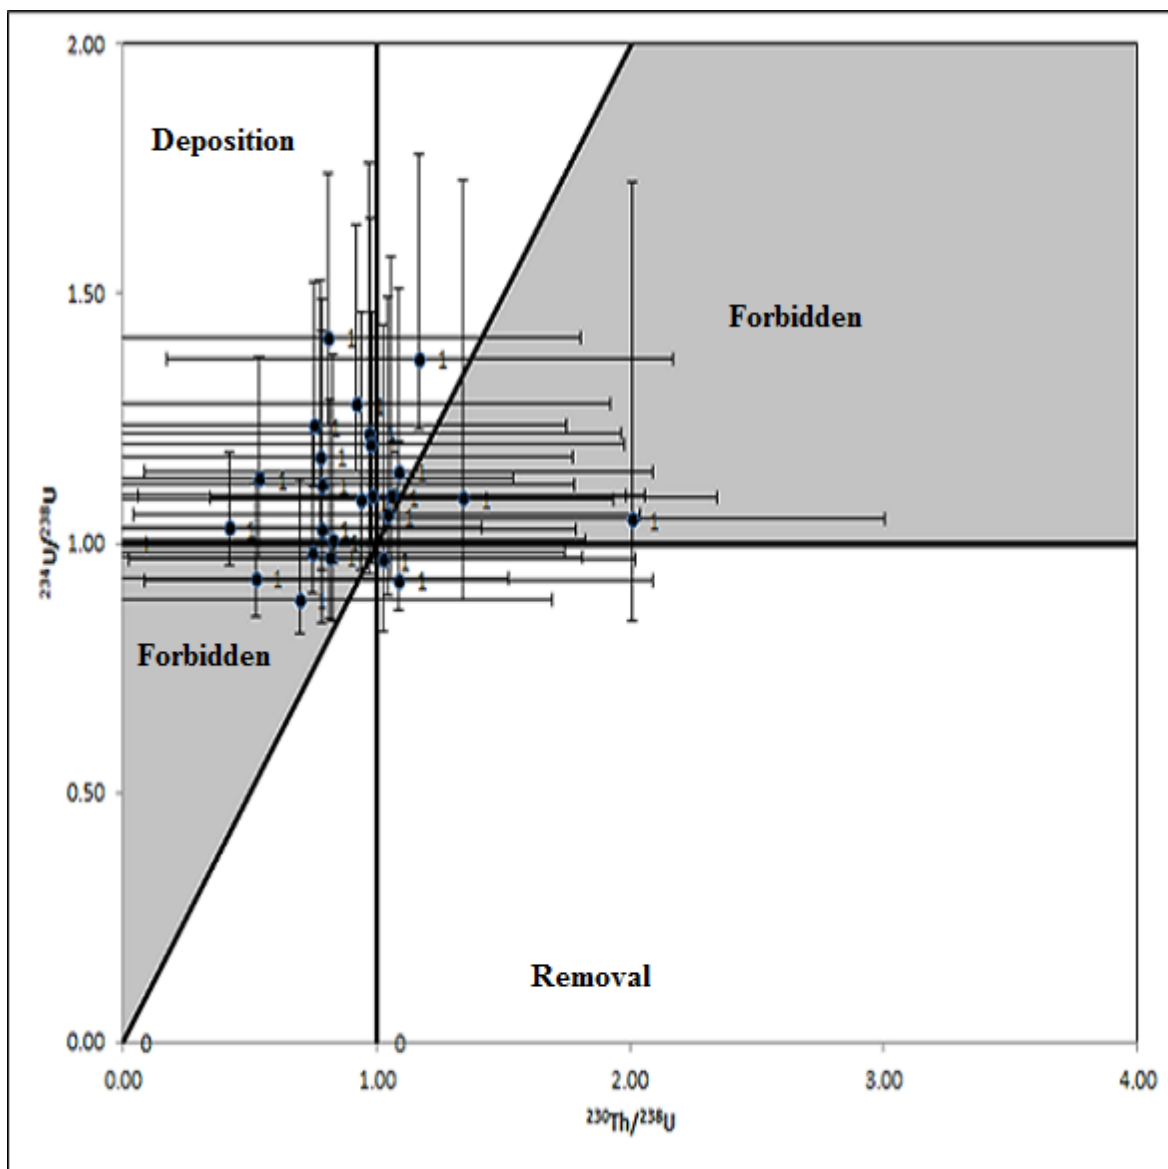

*Figure S1*  $^{234}\text{U}/^{238}\text{U}$  vs  $^{230}\text{Th}/^{238}\text{U}$  diagram for total dissolution analyses of sediments from Edale Valley (Grey colour represents forbidden zones)

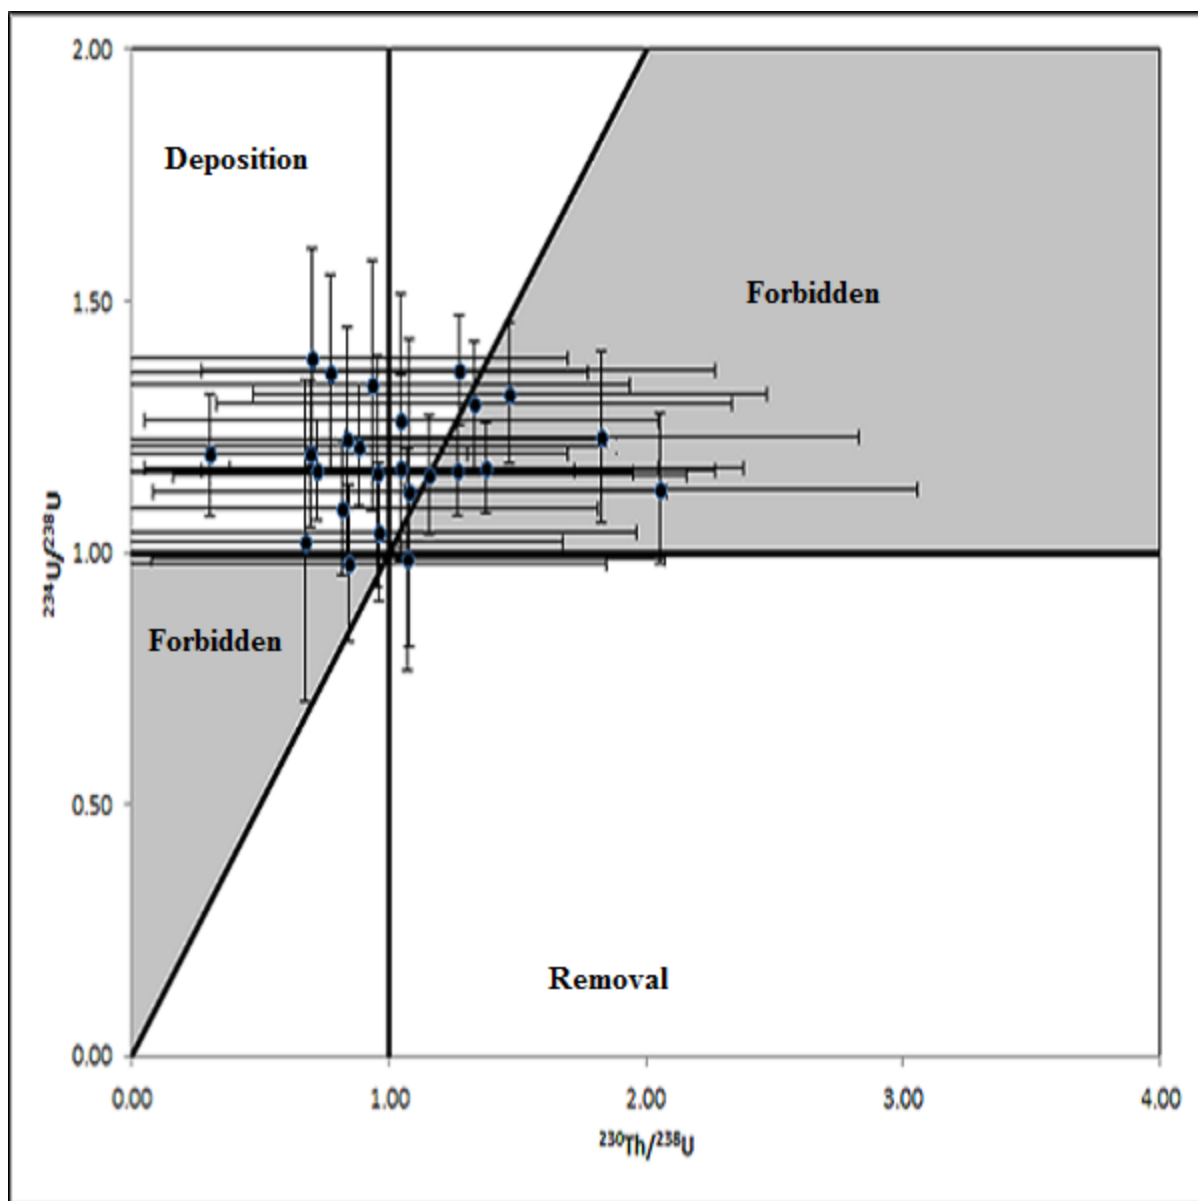

**Figure S2**  $^{234}\text{U}/^{238}\text{U}$  vs  $^{230}\text{Th}/^{238}\text{U}$  diagram for aqua regia leaching of sediments from Edale Valley (Grey colour represents forbidden zones)

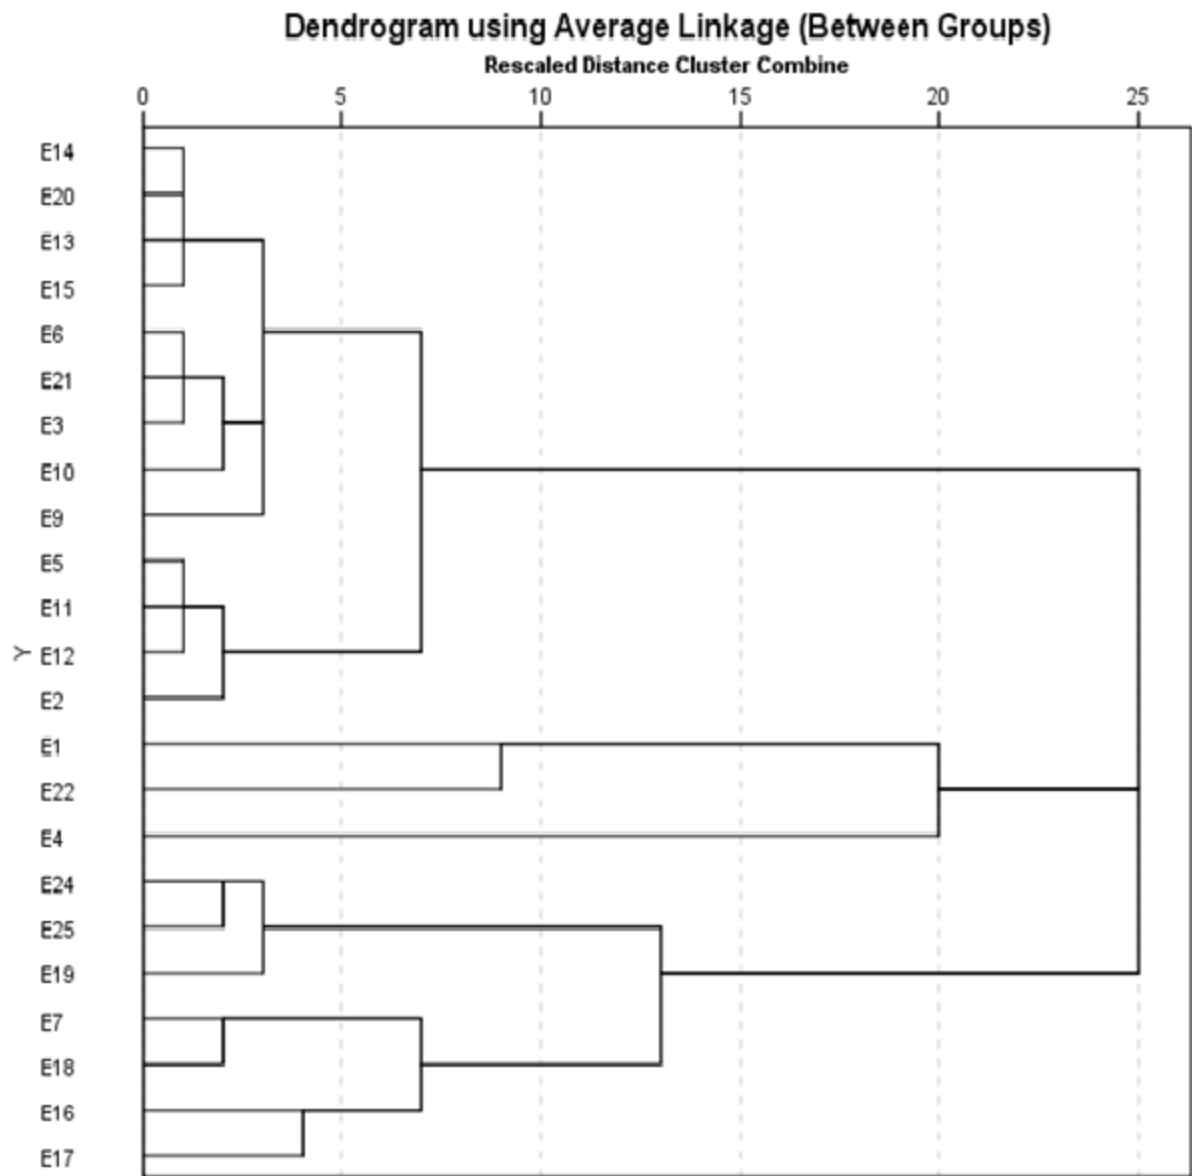

**Figure S3** Dendrogram illustrating cluster analysis, from total dissolution data, for sediments from Edale valley based on five variables:  $[^{238}\text{U}]$ ,  $[^{234}\text{U}]$ ,  $[^{230}\text{Th}]$ ,  $[^{226}\text{Ra}]$  and loss on ignition

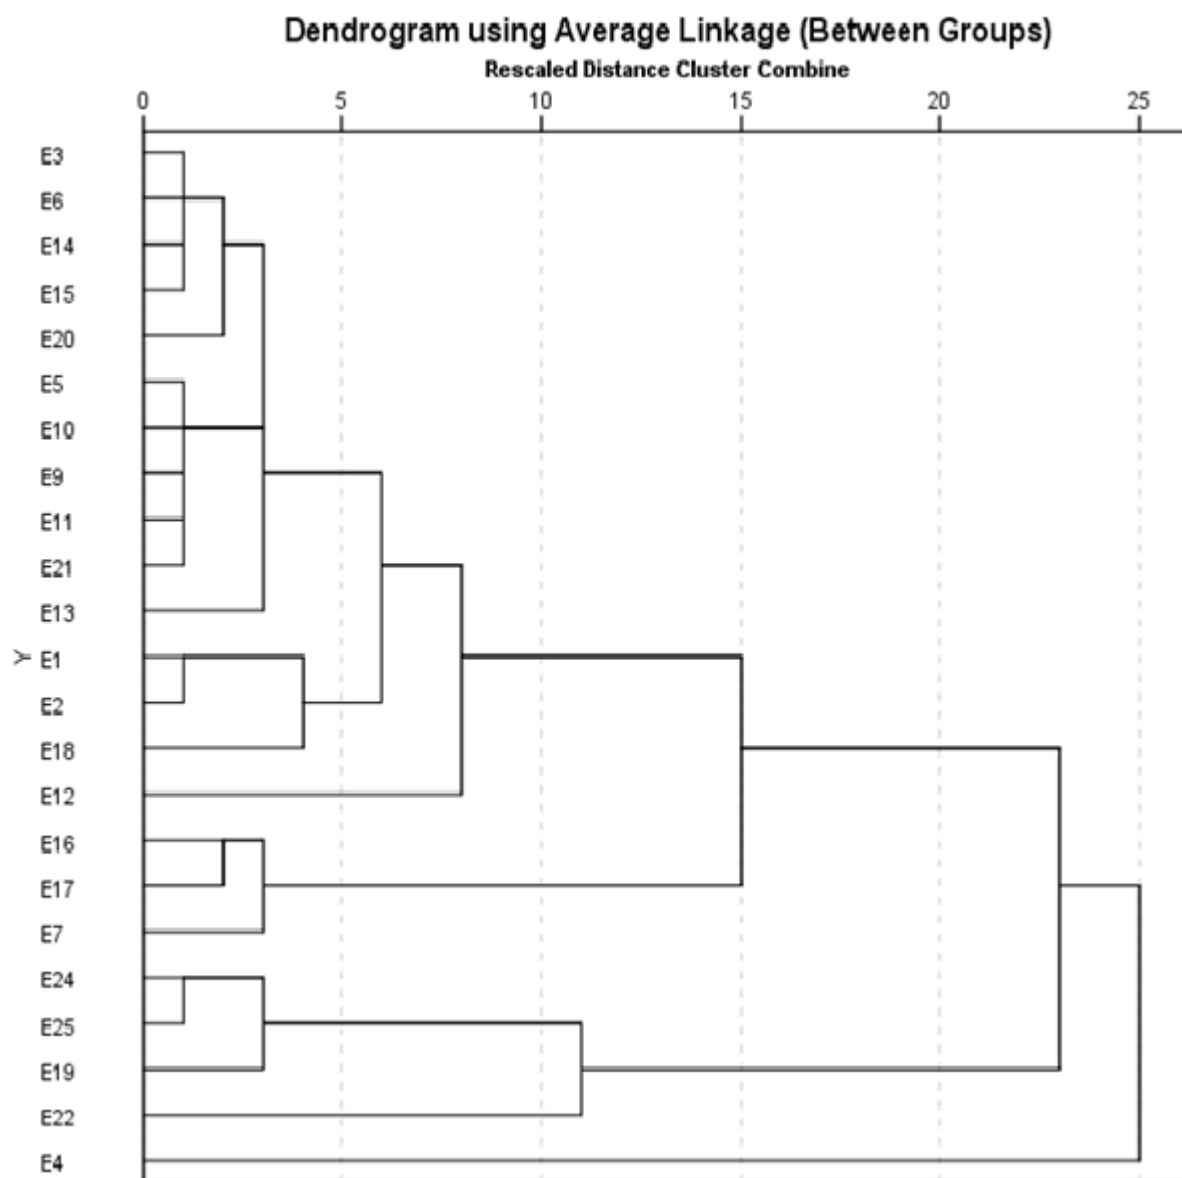

**Figure S4** Dendrogram illustrating cluster analysis, from aqua regia leaching, of sediments from Edale valley based on five variables:  $[^{238}\text{U}]$ ,  $[^{234}\text{U}]$ ,  $[^{230}\text{Th}]$ ,  $[^{226}\text{Ra}]$  and loss on ignition
